# Supplementary material
Source: Springer Nature journal article supplement (https://www.springermedizin.de/resource/supplementary/12913_2006_432_MOESM1_ESM.pdf/9535196)
Supplement: MOESM1 [file 9535196]

## **Additional File 1** Search strategy

### **Databases**

MEDLINE 1966–2005

CINAHL 1982–2005

HealthSTAR 1975–2005

### **Quality and processes of care search terms**

#1. PROCESS ASSESSMENT (HEALTH CARE)/

#2. OUTCOME ASSESSMENT (HEALTH CARE)/

#3. OUTCOME AND PROCESS ASSESSMENT (HEALTH CARE)/

#4. QUALITY INDICATORS, HEALTH CARE/

#5. QUALITY OF HEALTH CARE/

### **Mortality search terms**

#6. mortality.mp.

#7. exp MORTALITY/

### **Combinations**

#8. #1 or #2 or #3 or #4 or #5

#9. #6 or #7

#10. #8 and #9
